# Supplementary material
Source: publisher figshare collection journal article supplement (https://acs.figshare.com/ndownloader/files/3988018)
Supplement: Supplementary file 1 [file 3988018]

## Supporting Information for “Nanostructures and Electronic Properties of High-Efficiency Electron-Donating Polymer”

Ram S. Bhatta<sup>#,\*</sup>, David S. Perry<sup>†</sup>, Mesfin Tsige<sup>#,\*</sup>

<sup>#</sup>Department of Polymer Science, The University of Akron, Ohio 44325, United States

<sup>†</sup>Department of Chemistry, The University of Akron, Ohio 44325, United States

\*Corresponding authors: [mtsige@uakron.edu](mailto:mtsige@uakron.edu); [rsb20@uakron.edu](mailto:rsb20@uakron.edu)

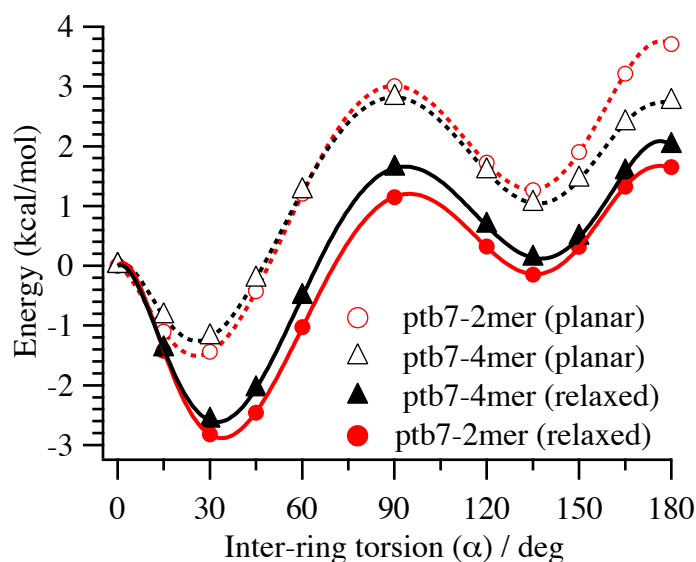

Figure S1. One-dimensional torsional potentials for planar and relaxed PTB7 oligomers as a function of inter-ring torsion angle,  $\alpha$ . Energies were computed without the dispersion correction (B3LYP/6-31+G(d,p)). Please refer to the text (and Fig.3) for more details.

Table S1: Computed energies of PTB7 oligomers at different inter-ring torsion angles. Energies were computed with the dispersion corrected DFT (B3LYP-D/6-31+G(d,p). Please refer to Fig. 3 and text for more detail.

| Torsion<br>(deg) | Energy (kcal/mol) <sup>a</sup> |       |       |       | Energy (kcal/mol) <sup>b</sup> |       |       |
|------------------|--------------------------------|-------|-------|-------|--------------------------------|-------|-------|
|                  | 2-mer                          | 4-mer | 6-mer | 8-mer | 2-mer                          | 4-mer | 6-mer |
| 0                | 0                              | 0     | 0     | 0     | 0                              | 0     | 0     |
| 15               | -1.29                          | -1.06 | -1.36 |       | -1.99                          | -1.96 | -2.08 |
| 30               | -1.48                          | -1.22 | -1.56 |       | -3.85                          | -3.71 | -3.84 |
| 45               | 0.07                           | 0.22  |       |       | -3.28                          | -2.98 | -3.14 |
| 60               | 2.05                           | 1.99  | 2.03  |       | -1.3                           | -0.9  | -1.06 |
| 90               | 4.06                           | 3.74  | 4.04  | 3.60  | 1.44                           | 1.82  | 1.65  |
| 120              | 2.41                           | 2.16  | 2.37  |       | 0.41                           | 0.68  | 0.51  |
| 135              | 1.82                           | 1.45  | 1.8   |       | -0.18                          | -0.03 | -0.18 |
| 150              | 2.63                           | 1.97  | 2.57  |       | 0.44                           | 0.42  | 0.29  |
| 165              | 4.1                            | 3.04  | 4.06  |       | 1.59                           | 1.52  | 1.42  |
| 180              | 4.54                           | 3.36  | 4.54  |       | 1.89                           | 1.88  | 1.83  |

<sup>a</sup>Energies relative to planar PTB7 oligomers

<sup>b</sup>Energies relative to relaxed PTB7 oligomers
